# Supplementary material for: Insect Pollinated Crops, Insect Pollinators and US Agriculture: Trend Analysis of Aggregate Data for the Period 1992–2009
Source: PLOS journal article supplement (doi:10.1371/journal.pone.0037235), 2012-05-22
Supplement: S1 (10.1371/journal.pone.0037235.s001) [file journal.pone.0037235.s001]

1  
2  
3  
4  
5  
6  
7  
8  
9  
10  
11  
12  
13  
14  
15  
16  
17  
18  
19  
20  
21  
22  
23  
24  
25  
26  
27  
28  
29  
30  
31  
32  
33  
34  
35  
36  
37

Supporting Text (S1) for:  
Insect pollinated crops, insect pollinators and US agriculture: Trend analysis of aggregate data  
for the period 1992 – 2009

**Alfalfa production**

Nicholas W. Calderone  
Dyce Laboratory for Honey Bee Studies  
Department of Entomology  
Cornell University  
Ithaca, New York USA

This file includes:

- Introduction
- Materials and Methods
- Results
- References
- Supplemental Tables S1-S3

38

## Introduction

39 In the US, alfalfa seed is produced in three general regions: California (CA), the Pacific  
40 Northwest (PNW: ID, MT, NV, OR, UT, WA and WY) and other alfalfa-seed producing states  
41 (OTHER: AZ, IA, IN, KS, MI, MN, MO, NE, ND, NM, NY, OK, SD and TX). Alfalfa seed is  
42 required for the production of alfalfa hay. Alfalfa seed is produced using honey bees, alfalfa  
43 leafcutter bees (*Megachile rotundata*), alkali bees (*Nomia melanderi*) and other wild solitary  
44 bees and insects with each pollinator playing a greater or lesser role in each region. The  
45 apportionment of direct and indirect production (and value) of alfalfa seed and alfalfa hay,  
46 respectively, among those pollinators requires estimates of the relative contribution each region  
47 makes to total US seed production and the relative contribution each pollinator makes to alfalfa  
48 seed production in each region.

49

50

## Materials and Methods

51 Data on alfalfa seed production were obtained from the National Agricultural Statistics Service  
52 (NASS) Census of Agriculture for 1997 and 2002 [1,2]. Estimates for alfalfa seed production for  
53 the years 1992, 1997, 2002 and 2007 are given in Table S1 and Table S2. The total contributions  
54 of each region to total US alfalfa seed in those years were relatively constant; therefore, I used  
55 the production weighted means for each region as an estimate of the contribution of each region  
56 to total US seed production for all years. Weighted four-year means were 0.64795 for the PNW,  
57 0.31122 for CA, and 0.04083 for OTHER states. Prior to 1990, honey bees were the primary  
58 pollinator of alfalfa seed in CA, while the leafcutter bee and, to a lesser extent, the alkali bee,  
59 were used in the PNW. Growers in OTHER states do not manage alkali bees, and they may or

60 may not rent honey bees. I assume that half of the seed production in OTHER states is due to  
61 honey bees and half to other insects, primarily bumblebees and solitary bees.

62

63 The estimate of the proportion of US seed dependent on honey bees in 1988 is calculated as the  
64 sum of 0.31122 (the weighted average CA seed production as a proportion of total US seed  
65 production) plus 0.02042 (half of the weighted average of alfalfa seed production in OTHER  
66 states). An estimate of 0.05 for the dependence of US alfalfa seed on *N. melanderi* is based on  
67 published estimates [3], and this is combined with an estimate of 0.02042 (the other half of the  
68 weighted average of alfalfa seed production in OTHER states) to give 0.07042, the total  
69 proportion due to bumble bees and solitary bees, exclusive of *M. rotundata*. The proportion  
70 attributed to *M. rotundata* was calculated as total production less the proportions due to honey  
71 bees, bumble bees, alkali bees and other insect pollinators.

72

73 Starting around 1990, managed leafcutter bees have been used for alfalfa seed production in  
74 increasing numbers in CA; although, they are generally used to compliment honey bees rather  
75 than to replace them [4]. Hence, the relative contributions of those two species to the production  
76 of alfalfa seed and alfalfa hay have changed over time, with a growing portion due to *M.*  
77 *rotundata*. Based on published reports [4,5], and on an admitted scarcity of hard data, I estimate  
78 that the relative contribution of honey bees in CA has decreased by 1% each year since 1990.  
79 Estimates of the relative contributions of each pollinator to alfalfa seed production are given in  
80 Table S3. These revised estimates should be considered tentative and will require refinement as  
81 additional data become available.

82

83

## References

84

- 85 1. NASS (1999) 1997 Census of Agriculture, ac97-a-51. National Agricultural Statistics Service, USDA.  
86 Washington, D.C. 629 p. USDA Census of Agriculture website. Available:  
87 [http://www.agcensus.usda.gov/Publications/1997/Vol\\_1\\_Chapter\\_1\\_U. S. National Level Dat](http://www.agcensus.usda.gov/Publications/1997/Vol_1_Chapter_1_U.S._National_Level_Data/)  
88 [a/](http://www.agcensus.usda.gov/Publications/1997/Vol_1_Chapter_1_U.S._National_Level_Data/). Accessed: 4/21/2012.
- 89 2. NASS (2004) 2002 Census of Agriculture ac-02-a-51. National Agricultural Statistics Service, USDA.  
90 Washington, D.C. 663 p. USDA Census of Agriculture website. Available:  
91 <http://www.agcensus.usda.gov/Publications/2002/USVolume104.pdf>. Accessed: 8/11/2011.
- 92 3. Losey J, Vaughan M (2006) The economic value of ecological services provided by insects. *Bioscience*  
93 56: 311-323.
- 94 4. Mueller SC (2008) Alfalfa seed production in California. In: Summers C, Putnam D, editors. *Irrigated*  
95 *alfalfa management for mediterranean and desert zones*. Pub. Number 8308. . Oakland:  
96 University of California Agriculture and Natural Resources Communication Services.
- 97 5. Anon (1995) Use of the alfalfa leafcutter bee growing in California. *Seed Trade News* 116: 14.

98

99

100

101

102 Table S1. Alfalfa seed production in 1992 and 1997.  
 103

| <u>1997</u>            |                         |                         |                            | <u>1992</u>            |                         |                         |                            |
|------------------------|-------------------------|-------------------------|----------------------------|------------------------|-------------------------|-------------------------|----------------------------|
| <u>State</u>           | <u>Production (lbs)</u> | <u>Production (kgs)</u> | <u>Proportion US Total</u> | <u>State</u>           | <u>Production (lbs)</u> | <u>Production (kgs)</u> | <u>Proportion US Total</u> |
| UT                     | 1,234,694               | 560,048                 | 0.01476                    | UT                     | 1,046,414.00            | 474,645                 | 0.01440                    |
| WA                     | 10,990,656              | 4,985,278               | 0.13142                    | WA                     | 13,564,621.00           | 6,152,809               | 0.18660                    |
| WY                     | 2,010,084               | 911,759                 | 0.02404                    | WY                     | 864,720.00              | 392,230                 | 0.01190                    |
| OR                     | 6,524,648               | 2,959,531               | 0.07802                    | OR                     | 703,437.00              | 319,074                 | 0.00968                    |
| NV                     | 7,636,279               | 3,463,758               | 0.09131                    | NV                     | 5,245,571.00            | 2,379,351               | 0.07216                    |
| MT                     | 3,442,626               | 1,561,549               | 0.04117                    | MT                     | 2,466,195.00            | 1,118,647               | 0.03393                    |
| ID                     | 22,819,512              | 10,350,757              | 0.27287                    | ID                     | 21,695,511.00           | 9,840,918               | 0.29846                    |
| <b>PNW sub-total</b>   | <b>54,658,499</b>       | <b>24,792,678</b>       | <b>0.65360</b>             | <b>PNW sub-total</b>   | <b>45,586,469.00</b>    | <b>20,677,675</b>       | <b>0.62711</b>             |
| <b>CA sub-total</b>    | <b>26,329,096</b>       | <b>11,942,677</b>       | <b>0.31484</b>             | <b>CA sub-total</b>    | <b>25,082,048.00</b>    | <b>11,377,026</b>       | <b>0.34504</b>             |
| AZ                     | 735,702                 | 333,709                 | 0.00880                    | AZ                     | 299,757.00              | 135,967                 | 0.00412                    |
| CO                     | 311,599                 | 141,339                 | 0.00373                    | CO                     | 118,513.00              | 53,757                  | 0.00163                    |
| IA                     | 29,750                  | 13,494                  | 0.00036                    | IA                     | 11,840.00               | 5,371                   | 0.00016                    |
| IN                     | 5,720                   | 2,595                   | 0.00007                    | IN                     | 4,720.00                | na                      | 0.00006                    |
| KS                     | 294,269                 | 133,478                 | 0.00352                    | KS                     | 134,970.00              | 61,221                  | 0.00186                    |
| MI                     | 2,680                   | 1,216                   | 0.00003                    | MI                     | na                      | na                      | na                         |
| MN                     | 39,440                  | 17,890                  | 0.00047                    | MN                     | 144,730.00              | 65,648                  | 0.00199                    |
| MO                     | na                      | na                      | na                         | MO                     | na                      | na                      | na                         |
| NE                     | 78,615                  | 35,659                  | 0.00094                    | NE                     | 184,285.00              | 83,590                  | 0.00254                    |
| ND                     | 36,765                  | 16,676                  | 0.00044                    | ND                     | 99,026.00               | 44,917                  | 0.00136                    |
| NM                     | 112,843                 | 51,185                  | 0.00135                    | NM                     | 245,787.00              | 111,487                 | 0.00338                    |
| NY                     | na                      | na                      | na                         | NY                     | na                      | na                      | na                         |
| OH                     | 15,660                  | 7,103                   | 0.00019                    | OH                     | 5,850.00                | 2,654                   | 0.00008                    |
| OK                     | 158,143                 | 71,732                  | 0.00189                    | OK                     | 152,804.00              | 69,311                  | 0.00210                    |
| PA                     | 9,480                   | na                      | 0.00011                    | PA                     | 6,545.00                | (na)                    | 0.00009                    |
| SD                     | 614,546                 | 278,753                 | 0.00735                    | SD                     | 400,075.00              | 181,471                 | 0.00550                    |
| TX                     | 156,760                 | 71,105                  | 0.00187                    | TX                     | 214,980.00              | 97,513                  | 0.00296                    |
| Not specified          | 37,556                  | 17,035                  | 0.00045                    | -                      | -                       | -                       | -                          |
| <b>OTHER sub-total</b> | <b>2,639,528</b>        | <b>1,192,970</b>        | <b>0.03156</b>             | <b>OTHER sub-total</b> | <b>2,023,882</b>        | <b>912,908</b>          | <b>0.02784</b>             |
| <b>Totals</b>          | <b>83,627,123</b>       | <b>37,928,325</b>       | <b>Σ=1.00</b>              | <b>Totals</b>          | <b>72,692,399</b>       | <b>32,967,608</b>       | <b>Σ=1.00</b>              |

104 CA = California; PNW = Pacific Northwest (UT, WA, WY, OR, NV, MT and ID); OTHER = other alfalfa seed producing states (source: 1997  
 105 Census of Agriculture Table 28); na = not available; lbs = pounds; kgs = kilograms  
 106  
 107

108

109 Table S2. Alfalfa seed production in 2002 and 2007.  
 110

| <u>2007</u>            |                         |                         |                            | <u>2002</u>            |                         |                         |                            |
|------------------------|-------------------------|-------------------------|----------------------------|------------------------|-------------------------|-------------------------|----------------------------|
| <u>State</u>           | <u>Production (lbs)</u> | <u>Production (kgs)</u> | <u>Proportion US Total</u> | <u>State</u>           | <u>Production (lbs)</u> | <u>Production (kgs)</u> | <u>Proportion US Total</u> |
| UT                     | 2,077,813               | 942,480                 | 0.03345                    | UT                     | 830,889                 | 376,885                 | 0.01432                    |
| WA                     | 10,860,608              | 4,926,289               | 0.17485                    | WA                     | 11,887,387              | 5,392,028               | 0.20488                    |
| WY                     | 5,915,819               | 2,683,370               | 0.09524                    | WY                     | 2,400,315               | 1,088,765               | 0.04137                    |
| OR                     | 3,183,375               | 1,443,955               | 0.05125                    | OR                     | 3,783,887               | 1,716,342               | 0.06522                    |
| NV                     | 4,237,101               | 1,921,917               | 0.06821                    | NV                     | 4,695,737               | 2,129,950               | 0.08093                    |
| MT                     | 3,729,635               | 1,691,734               | 0.06004                    | MT                     | 2,024,033               | 918,086                 | 0.03489                    |
| ID                     | 9,346,709               | 4,239,596               | 0.15047                    | ID                     | 13,910,135              | 6,309,531               | 0.23975                    |
| <b>PNW sub-total</b>   | <b>39,351,060</b>       | <b>17,849,341</b>       | <b>0.63352</b>             | <b>PNW sub-total</b>   | <b>39,532,383</b>       | <b>17,931,587</b>       | <b>0.68136</b>             |
| <b>CA sub-total</b>    | <b>19,083,458</b>       | <b>8,656,111</b>        | <b>0.30723</b>             | <b>CA sub-total</b>    | <b>15,543,144</b>       | <b>7,050,252</b>        | <b>0.26789</b>             |
| AZ                     | 1,902,669               | 863,036                 | 0.03063                    | AZ                     | 574,020                 | 260,371                 | 0.00989                    |
| IN                     | na                      | na                      | na                         | CO                     | 58,293                  | 26,441                  | 0.00100                    |
| KS                     | 22,430                  | 10,174                  | 0.00036                    | IA                     | 12,467                  | 5,655                   | 0.00021                    |
| MI                     | 15,610                  | 7,081                   | 0.00025                    | IN                     | na                      | na                      | na                         |
| MN                     | 63,461                  | 28,785                  | 0.00102                    | KS                     | 1,133,502               | 514,148                 | 0.01954                    |
| MO                     | 40,540                  | 18,389                  | 0.00065                    | MI                     | 8,870                   | 4,023                   | 0.00015                    |
| NE                     | 21,216                  | 9,623                   | 0.00034                    | MN                     | 59,245                  | 26,873                  | 0.00102                    |
| ND                     | 34,784                  | 15,778                  | 0.00056                    | MO                     | 29,709                  | 13,476                  | 0.00051                    |
| NM                     | 29,907                  | 13,566                  | 0.00048                    | NE                     | 109,428                 | 49,636                  | 0.00189                    |
| NY                     | 6,180                   | 2,803                   | 0.00010                    | ND                     | 38,482                  | 17,455                  | 0.00066                    |
| OK                     | 281,121                 | 127,514                 | 0.00453                    | NM                     | 75,036                  | 34,036                  | 0.00129                    |
| PA                     | na                      | na                      | na                         | NY                     | 101,827                 | 46,188                  | 0.00176                    |
| SD                     | 428,447                 | 194,340                 | 0.00690                    | OH                     | 2,520                   | 1,143                   | 0.00004                    |
| TX                     | 79,885                  | 36,235                  | 0.00129                    | OK                     | 335,878                 | 152,352                 | 0.00579                    |
| CO, IA, OH             | 754,471                 | 342,222                 | 0.01215                    | PA                     | na                      | na                      | na                         |
| -                      | -                       | -                       | -                          | SD                     | 327,576                 | 148,586                 | 0.00565                    |
| -                      | -                       | -                       | -                          | TX                     | 77,600                  | 35,199                  | 0.00134                    |
| <b>OTHER sub-total</b> | <b>3,680,721</b>        | <b>1,669,547</b>        | <b>0.05926</b>             | <b>OTHER sub-total</b> | <b>2,944,453</b>        | <b>1,335,581</b>        | <b>0.05075</b>             |
| <b>Totals</b>          | <b>62,115,239</b>       | <b>28,174,998</b>       | <b>Σ=1.00</b>              | <b>Totals</b>          | <b>58,019,980</b>       | <b>26,317,420</b>       | <b>Σ=1.00</b>              |

111  
 112 CA = California; PNW = Pacific Northwest (UT, WA, WY, OR, NV, MT and ID); OTHER = other alfalfa seed producing states (source: 1997  
 113 Census of Agriculture Table 27); na = not available; lbs = pounds; kgs = kilograms  
 114

115 Table S3. Proportion of California (CA) and US alfalfa seed crop attributed to *A. mellifera*, *M.*  
 116 *rotundata*, *N. melanderi* and other pollinating insects.  
 117

| <b>YEAR</b> | <b>Proportion of CA seed dependent on <i>A. mellifera</i></b> | <b>Proportion of US seed dependent on <i>A. mellifera</i></b> | <b>Proportion of US seed dependent on <i>M. rotundata</i></b> | <b>Proportion of US seed dependent on <i>N. melanderi</i></b> | <b>Proportion of US seed dependent on <i>N. melanderi</i> and other insect pollinators</b> |
|-------------|---------------------------------------------------------------|---------------------------------------------------------------|---------------------------------------------------------------|---------------------------------------------------------------|--------------------------------------------------------------------------------------------|
| <b>1988</b> | 1.0000                                                        | 0.3316                                                        | 0.5979                                                        | 0.0500                                                        | 0.0704                                                                                     |
| <b>1989</b> | 1.0000                                                        | 0.3316                                                        | 0.5979                                                        | 0.0500                                                        | 0.0704                                                                                     |
| <b>1990</b> | 1.0000                                                        | 0.3316                                                        | 0.5979                                                        | 0.0500                                                        | 0.0704                                                                                     |
| <b>1991</b> | 0.9900                                                        | 0.3285                                                        | 0.6011                                                        | 0.0500                                                        | 0.0704                                                                                     |
| <b>1992</b> | 0.9800                                                        | 0.3254                                                        | 0.6042                                                        | 0.0500                                                        | 0.0704                                                                                     |
| <b>1993</b> | 0.9700                                                        | 0.3223                                                        | 0.6073                                                        | 0.0500                                                        | 0.0704                                                                                     |
| <b>1994</b> | 0.9600                                                        | 0.3192                                                        | 0.6104                                                        | 0.0500                                                        | 0.0704                                                                                     |
| <b>1995</b> | 0.9500                                                        | 0.3161                                                        | 0.6135                                                        | 0.0500                                                        | 0.0704                                                                                     |
| <b>1996</b> | 0.9400                                                        | 0.3130                                                        | 0.6166                                                        | 0.0500                                                        | 0.0704                                                                                     |
| <b>1997</b> | 0.9300                                                        | 0.3099                                                        | 0.6197                                                        | 0.0500                                                        | 0.0704                                                                                     |
| <b>1998</b> | 0.9200                                                        | 0.3067                                                        | 0.6229                                                        | 0.0500                                                        | 0.0704                                                                                     |
| <b>1999</b> | 0.9100                                                        | 0.3036                                                        | 0.6260                                                        | 0.0500                                                        | 0.0704                                                                                     |
| <b>2000</b> | 0.9000                                                        | 0.3005                                                        | 0.6291                                                        | 0.0500                                                        | 0.0704                                                                                     |
| <b>2001</b> | 0.8900                                                        | 0.2974                                                        | 0.6322                                                        | 0.0500                                                        | 0.0704                                                                                     |
| <b>2002</b> | 0.8800                                                        | 0.2943                                                        | 0.6353                                                        | 0.0500                                                        | 0.0704                                                                                     |
| <b>2003</b> | 0.8700                                                        | 0.2912                                                        | 0.6384                                                        | 0.0500                                                        | 0.0704                                                                                     |
| <b>2004</b> | 0.8600                                                        | 0.2881                                                        | 0.6415                                                        | 0.0500                                                        | 0.0704                                                                                     |
| <b>2005</b> | 0.8500                                                        | 0.2850                                                        | 0.6446                                                        | 0.0500                                                        | 0.0704                                                                                     |
| <b>2006</b> | 0.8400                                                        | 0.2818                                                        | 0.6477                                                        | 0.0500                                                        | 0.0704                                                                                     |
| <b>2007</b> | 0.8300                                                        | 0.2787                                                        | 0.6509                                                        | 0.0500                                                        | 0.0704                                                                                     |
| <b>2008</b> | 0.8200                                                        | 0.2756                                                        | 0.6540                                                        | 0.0500                                                        | 0.0704                                                                                     |
| <b>2009</b> | 0.8100                                                        | 0.2725                                                        | 0.6571                                                        | 0.0500                                                        | 0.0704                                                                                     |

118  
 119 The estimate of the proportion of US seed dependent on honey bees is calculated as the sum of 0.3112 (weighted  
 120 average CA seed production as a % of total US seed production based on 1992, 1997, 2002 and 2007) plus 0.0204  
 121 (half of the weighted average of alfalfa seed production in OTHER states from Table 5). An estimate of 0.05 for  
 122 the dependence of US alfalfa seed on *N. melanderi* is based on Losey and Vaughan (2006), and this is combined  
 123 with an estimate of 0.0204 (the other half of the weighted average of alfalfa seed production in OTHER states  
 124 from Table 5) to give 0.0704, the estimate of the proportion of seed due to insects other than honey bees and  
 125 leafcutter bees. Value for the proportion of production attributed to *M. rotundata* was calculated as total  
 126 production less the proportions due to honey bees and other insects. Based on conversations with CA field crop  
 127 specialist, I assumed that the increase in the use of *M. rotundata* starting in 1990 results in a decrease in reliance  
 128 on honey bees of 1% per year.

129  
 7
